# Supplementary material for: Parathyroid hormone level is associated with sarcopenia: a meta-analysis
Source: Research Square preprint supplement (doi:10.21203/rs.3.rs-7314215/v1), 2025-08-19
Supplement: Supplementary file 1 [file 85695003390706ea029f553f.xlsx]

## Sheet: Sheet1
Appendix 5 Detailed characteristics of the included studies using NOS tool
Study	Author	Year	研究类型	Outcome	SP dignosis	Population source	Population samples	平均年龄	女性比例	BMI	rr	lci	uci	Risk ratio (95%CI)
Age and Ageing 2013; 42: 352–359	TAJAR	2013	Cross-sectional study	Frailty	Frailty status was determined using Fried’s phenotypic definition based on five criteria: exhaustion, weakness, slowness, low activity and sarcopenia.	community-dwelling	1504	69.4 (5.7)	0	27.8 (4.0)	1.24	1.01	1.52	1.24 (1.01–1.52)	OR,Per-SD
Arch Gerontol Geriatr. 2016;65:255-259	Huoa	2016	Cross-sectional study	sarcopenic	gait velocity <80 cm/second, grip strength <20 kg for females and <30 kg for males and height adjusted appendicular lean mass (ALM/ht2) <5.5 kg/m2 (female) and <7.26 kg/m2 (male).	hospital (Falls patients)	205	76.4 (5.4)	0.732	34.9 (5.07)	2.09	1.64	6.87	2.09 (1.64–6.87)	OR
Asia Pac J Clin Nutr. 2020;29(4):712-723	Lee	2020	Cross-sectional study	sarcopenic	Asian Working Group for Sarcopenia (AWGS) criteria	hospital (Hemodialysis patients)	131	66.2 (10.5)	0.468	23.3 (2.1)	1.39	0.89	2.16	1.39 (0.89-2.16)	OR
Front. Med. 11:1487449	Hsu	2024	Cross-sectional study	sarcopenic	Asian Working Group for Sarcopenia (AWGS) criteria	hospital (peritoneal dialysis)	186	57.5 (14.1)	0.538	25.0 (4.1)	3.72	1.51	9.14	3.72 (1.51–9.14)	OR
Maturitas. 2018;113:21-25	Suriyaarachchi	2015	Cross-sectional study	sarcopenic	European Working Group on Sarcopenia criteria	hospital (falls or fracture)	400	79	0.65	/	6.88	1.9	9.2	6.88 (1.9-6.2)	OR
J Frailty Aging. 2018;7(4):253-257	Murthy	2018	Cross-sectional study	Frailty	frail if they had three or more of the following frailty components: weight loss, weakness/ reduced muscular strength, slow walking speed, exhaustion, and low activity level.	hospital (falls or fracture)	692	79	0.65	26.3 (3.7)	2.3	1.74	4.32	2.3 (1.74–4.32)	OR
Arch Gerontol Geriatr. 2015;60(2):349-353	Genaro	2015	Cross-sectional study	sarcopenic	European Working Group on Sarcopenia criteria	community-dwelling	105	70.6	1	/	1.15	0.74	1.78	1.15 (0.74–1.78)	OR
Sci Rep. 2017 Jan 23;7:40996	Chang	2017	Cross-sectional study	sarcopenic related-LVH	European Working Group on Sarcopenia criteria	community-dwelling	449	76.5 (6.2)	0.496	24.1 (3.9)	1.05	1.03	1.08	1.05 (1.03-1.08)	OR
J Clin Med. 2023, 12, 5499	Sravya	2023	Cross-sectional study	sarcopenic	Asian Working Group for Sarcopenia (AWGS) criteria	hospital (T2DM patients)	238	56.9 (6.0)	0.487	27.2 (3.4)	1.037	1.007	1.067	1.037 (1.007-1.067)	OR
Journal of Cachexia, Sarcopenia and Muscle 2015; 6: 242–252	Gielen	2015	Cohort	sarcopenic	European Working Group on Sarcopenia criteria	community-dwelling	518	60.0 (10.3)	0	27.2 (3.7)	0.98	0.4	2.38	0.98 (0.40, 2.38)	OR
J Clin Endocrinol Metab 2003, 88: 5766–5772	Visser	2003	Cohort	sarcopenic	We defined sarcopenia as a loss of appendicular skeletal muscle mass (ASMM) greater than 3% during follow-up.	community-dwelling	331	73.9 (6.0)	0.52	26.6 (4.0)	3.52	1.43	8.67	3.52 (1.43-8.67)	OR
							4759		5.541
									0.503727
