# Supplementary material for: Parathyroid hormone level is associated with sarcopenia: a meta-analysis
Source: Research Square preprint supplement (doi:10.21203/rs.3.rs-7314215/v1), 2025-08-19
Supplement: Supplementary file 2 [file 9d6b054937d699498baa2b61.docx]

# Appendix 4 Inclusion criteria specified in PICO

| **Parameter** | **Inclusion criteria** |
| --- | --- |
| Population | Adult participants aged 18 years or older |
| Intervention/exposure | The serum level of PHT |
| Comparison | Higher PHT level compared with low PHT level |
| Outcome | Skeletal muscle strength, mass, and sarcopenia |
