# Supplementary material for: Parathyroid hormone level is associated with sarcopenia: a meta-analysis
Source: Research Square preprint supplement (doi:10.21203/rs.3.rs-7314215/v1), 2025-08-19
Supplement: Supplementary file 3 [file b151c10e66142986658c5981.docx]

# Appendix 3 Search strategy

**Pubmed**

1. "Parathyroid Hormone"[MeSH Terms] OR "Parathyroid Hormone"[Title/Abstract] OR "parathormone"[Title/Abstract]

2. "sarcopenia"[MeSH Terms] OR "sarcopeni*"[Title/Abstract] OR "muscle mass"[Title/Abstract] OR "fat free mass"[Title/Abstract] OR "lean mass"[Title/Abstract] OR "muscle function"[Title/Abstract] OR "Muscle Strength"[Title/Abstract] OR "muscular strength"[Title/Abstract] OR "Muscle Strength"[MeSH Terms] OR "handgrip strength"[Title/Abstract] OR "grip strength"[Title/Abstract] OR "Hand Strength"[Title/Abstract] OR "Hand Strength"[MeSH Terms]

3. 1 AND 2

**Embase**

1. 'parathyroid hormone'/exp OR 'pth':ti,ab OR 'parathyroid hormone':ti,ab OR 'parathormone':ti,ab

2. 'sarcopenia'/exp OR sarcopeni*:ti,ab OR 'muscle mass':ti,ab OR 'fat free mass':ti,ab OR 'lean mass':ti,ab OR 'muscle function':ti,ab OR 'muscle strength':ti,ab OR 'muscular strength':ti,ab OR 'handgrip strength':ti,ab OR 'grip strength':ti,ab OR 'hand strength':ti,ab

3. 1 AND 2

**Web of Science**

1. TS=("parathyroid hormone" OR "PTH" OR "parathormone")

2. TS=("sarcopenia" OR "sarcopeni*" OR "muscle mass" OR "fat free mass" OR "lean mass" OR "muscle function" OR "muscle strength" OR "muscular strength" OR "handgrip strength" OR "grip strength" OR "Hand Strength")

3. 1 AND 3
